# Supplementary material for: Physical soil quality indicators for monitoring British soils
Source: Copernicus journal article supplement (doi:10.5194/se-2016-153), 2016-11-18
Supplement: Supplementary file [file se-2016-153-AC2-supplement.pdf]

## Anonymous Referee #1

The manuscript deals with the selection of physical soil indicators suitable for monitoring activities in England. The subject is topical and interesting also beyond the UK, but it has been not treated properly. Main drawbacks are:

- i) The section dealing with soil sealing is somehow an attachment to that dealing with soil qualities. It should have been treated in a separate paper, possibly. On the other hand, the first part, related to soil qualities, could be expanded. Rather than an add-on or attachment, soil sealing was identified through the robust multi-stage approach using the literature, logical sieve and scenario-based approach. As such, the final physical SQIs were supported by the literature and also by the common needs of stakeholder groups. Whilst the approach to measuring soil sealing may seem very different to the other physical SQIs, it is nonetheless significant and we felt that it was important to include it as an example in contrast to the other physical SQIs. The three selected SQIs that we included in the manuscript were selected to illustrate the different approaches to the types of analyses that can be conducted depending on the type of soils data available (i.e. quantitative methods such as power analysis or pedo-transfer functions; semi-qualitative such as remote sensing).
- ii) The text is difficult to follow because of:
  - a. Too many relevant supplementary materials,  
We have attempted to include the bare minimum in terms of supporting figures (four in total) and tables (four in total) in the main text of the manuscript. The supplementary materials are there largely for reference purposes for anyone wishing to replicate the approach that we took. They don't necessarily need to be referred to in order to follow the manuscript.
  - b. Literature difficult to find (a major methodological issue is addressed to Rickson et al., 2012),  
Where possible we have included scientific papers that can be accessed through subscription. Some of the datasets used such as the CEH Land Cover Map require licences to access them and where this is the case, we have included the relevant information in the manuscript to ensure that it doesn't need to be referred to by the readership. The reports referred to in the text (such as DEFRA and the Rickson et al., 2012 paper) are all freely available online.
  - c. Same concepts expressed in different ways  
We attempted to clarify a few terms that may be confusing. For example, in the logical sieve, the terms 'criteria', 'categories', 'functions' and 'factors' have been used interchangeably in some instances. This has been addressed and the terms have been more explicitly defined and explained with examples for clarification.
- iii) The authors probably assume that the manuscript focuses on soil qualities related to the topsoil of agricultural lands, however, soil depth is also mentioned. On the other hand, physical properties of the underlying soil horizons are not mentioned.  
The physical SQIs were evaluated according to four criteria, one being land use. In this category, the candidate SQI should apply to all land uses found nationally including those resulting from different land management practices. As such, we do not solely refer to the topsoil of agricultural lands. The depth of soil was only mentioned in the section on packing density (page 13) in its use to measure bulk density of soils using the Kopecky ring method. We acknowledge that the depth of soil was mentioned as one of the final physical SQIs for further analysis, however, we selected three examples from the final shortlist (packing density; soil water retention characteristics; soil sealing) and this is why the depth of soils and underlying soil horizons is not addressed in the text. However, these are covered in the Rickson et al. 2012 Final report and WP2 report available online.
- iv) I am not sure that block sized 5 or 10 km<sup>2</sup> approximate management units of field size, this point should be clarified. We have clarified this in the text where 5 and 10km<sup>2</sup> refers to field scale, 25km<sup>2</sup> refers to farm scale and 50km<sup>2</sup> refers to landscape level.
- v) Results should be separated from discussion.  
We have referred to a number of research papers in *Solid Earth* for formatting and style. There are quite a number of papers that have an integrated result and discussion section. We felt this approach more appropriate as it meant that we were integrating our findings, thereby preventing repetition in the text and keeping the word count down.
- vi) Other pitfalls are:
  1. pag 2: In the introduction, the role of soil as a cultural heritage has not been treated. Actually, although soil is often considered as container of archaeological findings, its other not monetary values, e.g., among others, convener of information about events occurred during historical and geological times, should be much more acknowledged. Nevertheless, there are several publications on this issue, and even databases, which could be mentioned. The introduction has now been amended to include soil cultural heritage:

In recent years soil quality and its measurement have increasingly been based on soil functions (Loveland & Thompson, 2002; Ritz *et al.*, 2009; Rosa, 2005). These functions determine the ability of a soil to deliver and support ecosystem goods and services, which have been linked to human health and wellbeing. Soils are typically recognised for their role in provisioning goods such as building material, fresh water, fuel, fibre and food (Robinson *et al.*, 2013). They also interact with other environmental components (air and water) and provide a platform for infrastructure. The ecosystem services that rely on these functions include regulation of climate and hydrology, contaminant transformation, biocontrol of plant pathogens and parasites (Sylvain & Wall 2011) and water filtration/runoff reduction/purification (Breure *et al.*, 2012). Supporting services provided by soils include soil formation, soil fertility, biogeochemical cycling (C storage and nutrient cycling), decomposition of organic materials and plant available water. A number of cultural services are also supported such as recreational surfaces (Robinson *et al.*, 2013) and heritage services such as preserving historic artefacts, burial grounds and non-monetary values such as containing information of events that have occurred in historical and geological timescales (Costantini & L'Abate, 2009). There are a number of databases and protection in place for soils with cultural heritage (otherwise known as pedosites, geosites and geoparks) (Geosite, 2017; UNESCO, 2016).

**2. pag 3: indicators of soil quality are also required to assess the effectiveness of restoration strategies, some recent papers on solid earth well illustrated this issue**

**The text on page 3 has now been amended to include the role of soil quality indicators in assessing the effectiveness of restoration strategies:**

In order to measure soil quality and function, soil quality indicators are commonly used. Indicators of soil quality are required for environmental monitoring/reporting and provide the basis for many soil protection policies and monitoring programs (Pulleman *et al.*, 2012). They help assess human and natural impacts on soils and to identify the effectiveness (or otherwise) of sustainable land management practices (Doran & Parkin, 1994; Karlen & Stott, 1994; Schipper & Sparling, 2000). They have also been used to assess the effectiveness of restoration strategies (Costantini *et al.*, 2016).

**3. pag 4: the relationship between application of sensor technology and indicators could be better treated, since it is on cutting edge and treated by several authors**

**We briefly mentioned the use of sensor technology in the practical aspects of monitoring soil (page 4). We then go onto discuss the benefits and relationship between sensor technology and indicators (sample size) in the section on soil sealing (backed up with recent studies) as well as in the packing density section (see excerpt below):**

A number of proxies exist that overcome some of the issues regarding sampling effort using the traditional Kopecky ring method. These allow a higher resolution of measurements (1500-2500 samples) per hectare over larger areas and include on-line (mobile) and non-mobile systems (Rickson *et al.*, 2012). The methods used require multiple sensors and advanced techniques for data analysis (Mouazen & Ramon, 2006) such as a combination of Visual and Near Infrared (vis-NIR) measurements, combined with Theta probe determinations for soil moisture or with soil resistance (penetrometer measurements) and vis-NIR measurements to determine BD (and thus PD, when combined with clay content).

**4. pages 8 and 9: calling same things with different names, i.e., Category and Criteria, functions and factors, creates some confusion in the reader**

**We attempted to clarify a few terms that may be confusing. For example, in the logical sieve, the terms 'criteria' 'categories', 'functions' and 'factors' have been used interchangeably in some instances. This has been addressed and the terms have been more explicitly defined and explained with examples for clarification. These are also explained more in the supplementary materials.**

**5. lines 219-238: this section should be expanded, providing for details and examples**

**This section is largely addressed in the Rickson *et al.* (2012) study which we refer to in the text for reference:**

These were then further filtered by the project team in the Rickson *et al.* (2012) study to ensure the results of the logical sieve exercise were sensible and no indicators were disqualified unduly, data were available to test the robustness of the selected SQIs, duplication/surrogacy and scale issues (i.e. upscaling) were considered.

**6. line 252: what do you mean with power analysis?**

Statistical power is the probability that a specific difference will be detected at a specified level of confidence. It allows the determination of a sample size required to detect an effect of a given size with a degree of confidence. **This has been added to the text.**

**7. line 313: in fig 3 it is very difficult to detect the stated differences in sample size. May be using one graph only?**

**The four graphs in Figure 3, page 33 have been presented alongside each other to ease the comparisons of relationships between them according to block size.**

**8. table 3: specify Sv**

$S_v$  is related to  $S_g$  through the soil bulk density  $\rho_b$   $S_v = \rho_b S_g$ .
